# Supplementary material
Source: publisher figshare collection journal article supplement (https://karger.figshare.com/ndownloader/files/38935253)
Supplement: Supplementary file 1 [file 38935253]

**Supplementary Table 3 – Outcomes of endoscopic treatments besides EVT and stenting**

aTime until AL resolution was measured in weeks; NA: not available or unclear information

|  | Mortality – n (%) | Clinical success – n (%) | Endoscopic reintervention – n (%) | Surgical reintervention – n (%) | Migration – n (%) | Stenosis – n (%) | Severe bleeding – n (%) | Fistulae – n (%) | Perforation – n (%) | Hospital length of stay, days  - mean ± SD | ICU length of stay, days - mean ± SD | Time until AL resolution, days - mean ± SD | Time until oral intake, days - mean ± SD |
| --- | --- | --- | --- | --- | --- | --- | --- | --- | --- | --- | --- | --- | --- |
| Clips | | | | | | | | | | | | | |
| Ma, H. 2018 | - | - | - | - | - | 22 (34.4) | 0 (0) | 0 (0) | 0 (0) | 15.6 ± 2.8 | - | - | 13.1 ± 2.6 |
| Milek, T. 2016 | 0 (0) | 2 (50.0) | 2 (50.0) | 0 (0) | - | - | - | - | - | 19 ± NA | - | - | - |
| Schubert, D. 2006 | 0 (0) | 2 (100) | 0 (0) | 0 (0) | - | 0 (0) | 0 (0) | 0 (0) | 0 (0) | - | 5 ± 3 | - | - |
| Fibrin glue | | | | | | | | | | | | | |
| Kauer, W. K. 2007 | 0 (0) | 2 (100) | 0 (0) | 0 (0) | - | - | - | - | - | - | - | - | - |
| Schubert, D. 2006 | 0 (0) | 9 (75.0) | 3 (25.0) | 0 (0) | - | 3 (25.0) | 0 (0) | 0 (0) | 0 (0) | - | 11.7 ± 7.7 | - | - |
| Fibrin glue + vycril mesh | | | | | | | | | | | | | |
| Bohm, G. 2010 | 0 (0) | 13 (93.3) | 1 (6.7) | 0 (0) | - | NA | 0 (0) | 1 (6,7) | 0 (0) | - | - | 44 ± 9 | - |
| Fibrin glue and/or clip | | | | | | | | | | | | | |
| Lee, S. 2015 | 0 (0) | 24 (96.0) | 0 (0) | 1 (4.0) | - | 0 (0) | 1 (4.0) | 0 (0) | 0 (0) | 16.2 ± 10.8 | - | - | 8.4 ± 6.3 |
| Argon plasma coagulation | | | | | | | | | | | | | |
| Ma, H. 2018 | - | - | - | - | - | 2 (2.3) | 0 (0) | 0 (0) | 0 (0) | 9.5 ± 0.7 | - | - | 7.6 ± 0.6 |
| Stent + clip | | | | | | | | | | | | | |
| Leenders, B. J. M. 2013 | 0 (0) | 4 (80.0) | 0 (0) | 0 (0) | 2 (40.0) | 0 (0) | 0 (0) | 1 (20.0) | 0 (0) | 19.8 ± 9.8 | - | 9.7 ± 2.9a | - |
